# Supplementary material
Source: PubMed Central journal article supplement (PMC7029676)
Supplement: NIHMS1067342-supplement-Fig_S1_S2_S3_S4.pdf [file NIHMS1067342-supplement-Fig_S1_S2_S3_S4.pdf]

## Supporting Information

### Top-down Proteomic Characterization of Truncated Proteoforms

Dapeng Chen<sup>1,3</sup>, Lucia Geis-Asteggianti<sup>1,4</sup>, Fabio P Gomes<sup>1,5</sup>, Suzanne Ostrand-Rosenberg<sup>2</sup>, Catherine Fenselau<sup>1\*</sup>

<sup>1</sup>Department of Chemistry and Biochemistry, University of Maryland, College Park, MD; <sup>2</sup>Department of Biological Sciences, University of Maryland Baltimore County, Baltimore, MD;

<sup>3</sup>Current address: ZeteoTech Inc, Sykesville MD; <sup>4</sup>Current address: University Hospital Frankfurt, Frankfurt, Germany. <sup>5</sup>Current address: The Scripps Research Institute, La Jolla CA.

\*To whom correspondence should be addressed: fenselau@umd.edu

#### Supplementary Figures:

Figure S-1. GELFrEE fractions visualized by 1-D gels

Figure S-2. Gene ontology analysis of gene product precursors of the truncated proteoforms identified.

Figure S-3. Distribution of molecular masses of the truncated proteoforms identified.

Figure S-4. Number of truncated proteoforms for which a putative protease could be assigned to explain the produced amino termini and/or carboxyl termini of truncated forms.

#### Supplementary Tables:

Table S-1. Identified truncated proteoforms per gene product and assigned putative proteases.

Table S-1 can be found as a separate excel file

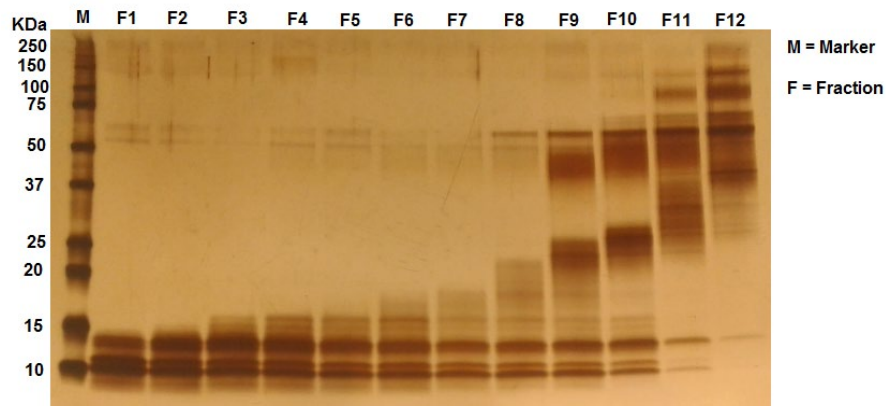

**Figure S-1.** GELFrEE fractions visualized by 1-D gels

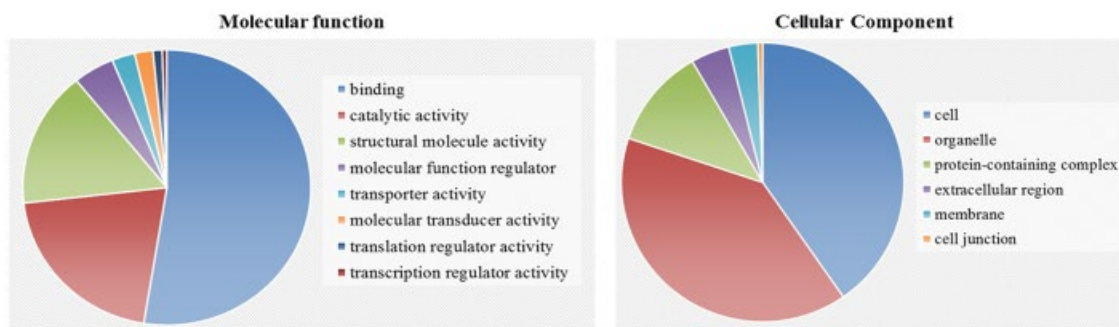

**Figure S-2.** Gene ontology analysis of gene product precursors of the truncated proteoforms identified.

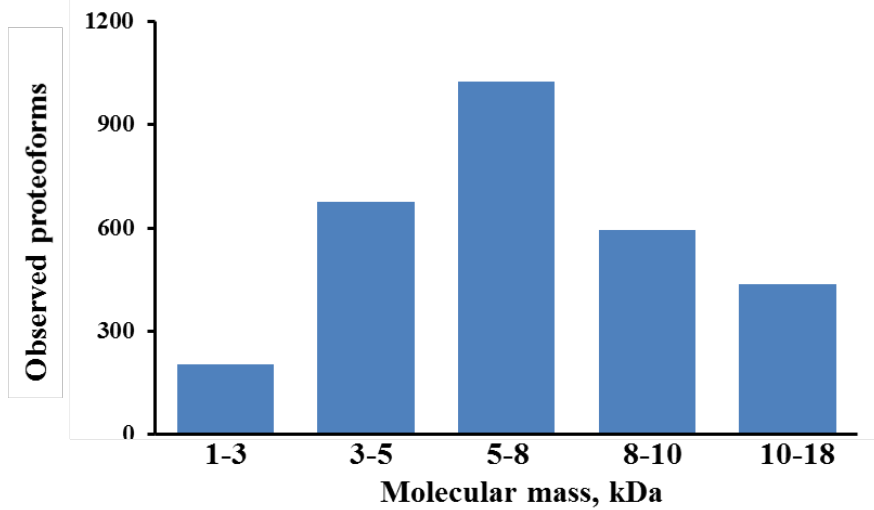

**Figure S-3.** Distribution of molecular masses of the truncated proteoforms identified.

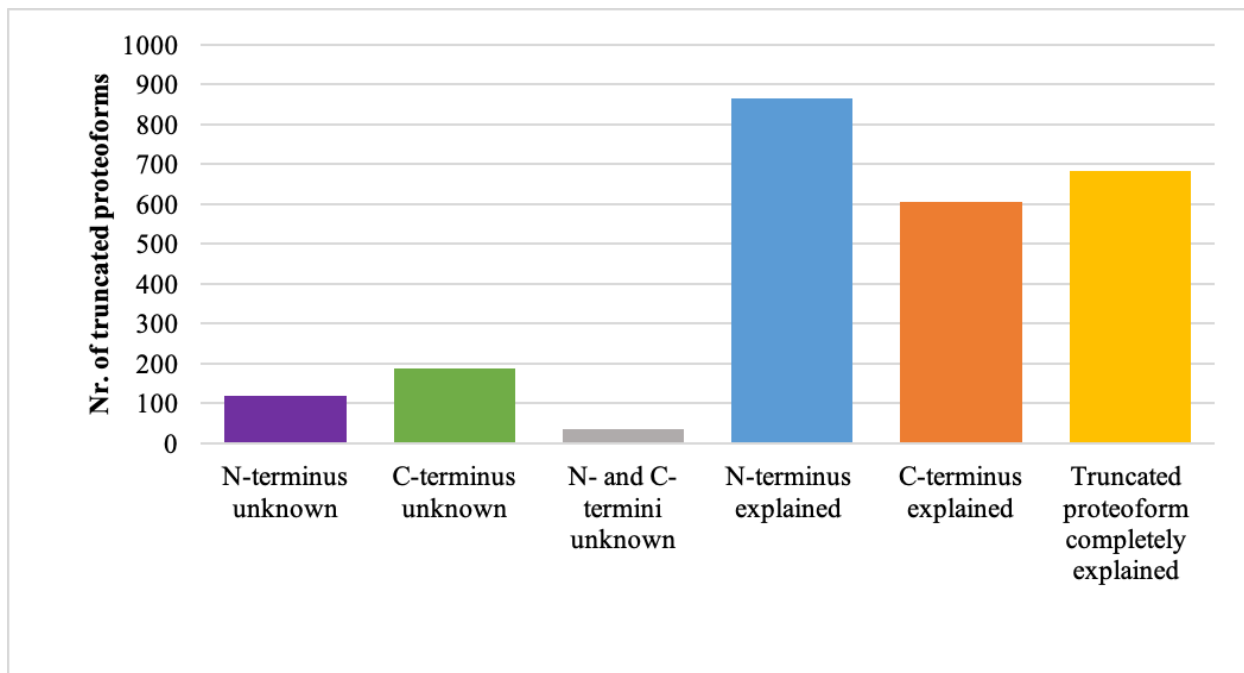

**Figure S-4.** Number of truncated proteoforms for which a putative protease could be assigned to explain the produced amino termini and/or carboxyl termini of truncated forms. For 34 proteoforms no proteases could be matched to either amino termini or the carboxyl termini.
